1 **Brain activations during execution and observation of visually guided sequential manual**  
2 **movements in autism and in typical development: A study protocol**

3 Erik Domellöf<sup>1</sup>, Hanna Hjärtström<sup>1</sup>, Anna-Maria Johansson<sup>1,2</sup>, Thomas Rudolfsson<sup>1,3</sup>, Sara Stillesjö<sup>1</sup>,  
4 Daniel Säfström<sup>4</sup>

5 <sup>1</sup>Department of Psychology, Umeå University, Umeå, Sweden

6 <sup>2</sup>Department of Health, Education and Technology, Luleå University of Technology, Luleå, Sweden

7 <sup>3</sup>Centre for Musculoskeletal Research, Department of Occupational Health Sciences and Psychology,  
8 University of Gävle, Gävle, Sweden

9 <sup>4</sup>Department of Integrative Medical Biology, Umeå University, Umeå, Sweden

10 **Funding**

11 This work was funded by the Knut and Alice Wallenberg Foundation (KAW 2020.0200). The funder  
12 had no role in study design, data collection and analysis, decision to publish, or preparation of the  
13 manuscript.

14 **Competing interests**

15 The authors have declared that no competing interests exist.

16 **Data availability**

17 Results from this study will primarily be communicated in the shape of international scientific  
18 publications (open access), conference contributions, and presentations to any interested audience.  
19 We further acknowledge a willingness to share the collected and analyzed data, and a de-identified  
20 data file will be open for the scientific community. Individual contrast files for the fMRI data will also  
21 be made available upon request.

22 **Abstract**

**NOTE: This preprint reports new research that has not been certified by peer review and should not be used to guide clinical practice.**

23 Motor issues are frequently observed accompanying core deficits in autism spectrum disorder (ASD).  
24 Impaired motor behavior has also been linked to cognitive and social abnormalities, and problems  
25 with predictive ability have been suggested to play an important, possibly shared, part across all  
26 these domains. Brain imaging of sensory-motor behavior is a promising method for characterizing  
27 the neurobiological foundation for this proposed key trait. The present functional magnetic  
28 resonance imaging (fMRI) developmental study, involving children/youth with ASD, typically  
29 developing (TD) children/youth, and neurotypical adults, will investigate brain activations during  
30 execution and observation of a visually guided, goal-directed sequential (two-step) manual task.  
31 Neural processing related to both execution and observation of the task, as well as activation  
32 patterns during the preparation stage before execution/observation will be investigated. Main  
33 regions of interest include frontoparietal and occipitotemporal cortical areas, the human mirror  
34 neuron system (MNS), and the cerebellum.

## 35 **Introduction**

36 Motor performance difficulties are highly prevalent in children and youth with autism spectrum  
37 disorder (ASD), adding to the challenges in daily life functioning [1]. The etiology is not clear,  
38 although converging evidence suggests that predictive control deficits may play a part in the  
39 presented movement problems [2-4]. Importantly, a similar connection has been made between  
40 predictive ability and autism core symptoms such as deficits in social interaction [5-6]. As autism is a  
41 neurodevelopmental condition, linked to early impact on the developing brain, it is thus possible that  
42 similar neural mechanisms related to predictive behavior operate in an atypical manner across  
43 different domains. Still, very little is known about parallel neural activity during behavioral  
44 performance requiring predictive control in this population.

45 Investigating goal-directed motor behavior in young individuals with ASD is a useful way to collect  
46 quantitative and reproduceable evidence for impaired predictive functioning. Brain imaging studies  
47 of action execution can provide a neurobiological characterization of this potentially defining trait in

48 autism but are very rare. In a seminal study, Mostofsky and colleagues reported that basic motor  
49 execution (finger tapping) was linked to atypical brain activations in the cerebellum and the  
50 supplementary motor area compared with typically developing (TD) children [7]. This suggests a  
51 neurological base for difficulties with motor performance. However, as far as we know, there are no  
52 studies to date that have investigated more complex, visually guided goal-directed movements using  
53 functional brain imaging in individuals with ASD.

54 In everyday life, we spend a significant amount of time using our hands in various goal-directed  
55 activities [8]. Typically, these activities are comprised of a series of sequentially linked actions, e.g.  
56 we reach for and grasp an object in order to do something with it. An impairment in the planning of  
57 movement and/or predictive movement control will make the execution of sequential manual tasks  
58 less smooth and efficient. Performance of action sequences has been linked to activity in  
59 frontoparietal and occipitotemporal circuits in neurotypical individuals [9-10]. Whether individuals  
60 with ASD engage these functional brain networks in the same way is currently unknown.

61 Impaired prediction skills may further influence the understanding of actions performed by others.  
62 The mirror neuron system (MNS) of the brain, located in frontoparietal brain regions, is activated  
63 both when executing and observing goal-directed action [11]. As such, the role of the MNS and  
64 extended networks has been targeted in several brain imaging studies related to observation of  
65 human biological action in children and youth with ASD, including gestures [12], hand reaching [13],  
66 eating and placing [14], and goal-directed action [15]. Findings from these studies are divergent and  
67 suggest either atypical activation in young participants with ASD compared with TD controls or no  
68 global differences between ASD and TD controls.

69 Taken together, more knowledge is needed regarding shared neural processing related to action  
70 execution and action observation within the MNS both in general and in individuals with ASD. To  
71 properly investigate this, brain imaging studies combining execution and observation of a goal-  
72 directed movement involving motor planning and predictive control are required. Brain activity

73 associated with action execution and observation in the MNS is possibly influenced by the ability for  
74 predictive control. As outlined above, impaired predictive control has been suggested as a salient  
75 phenotype in autism. Using a thorough methodology and a complex task (e.g. a goal-directed  
76 sequential action), it is possible that more clear-cut differences in patterns of MNS activation  
77 between ASD and TD individuals will be found compared to previous investigations. Finally, given the  
78 early onset of impairments in ASD, it is important to involve a developmental perspective in this  
79 research endeavor. To this end, the present study aims to investigate brain activations during  
80 execution and observation of visually guided sequential manual movements in one group of  
81 children/youth with ASD (12-16 years), one age-equivalent group of TD children/youth, and in one  
82 group of neurotypical adults (18-40 years). In addition, the children/youth will be asked to participate  
83 a second time one year after the first experimental run.

#### 84 Study aims

85 Brain activations will be measured by functional magnetic resonance imaging (fMRI) generating  
86 blood oxygen level dependent (BOLD) contrasts for activity in different brain areas during (i)  
87 execution of a visually guided, goal-directed sequential (two-step) manual task, and (ii) observation  
88 of a video showing a hand executing the sequential manual task. The following main aims will be  
89 pursued with regard to differences between children/youth with ASD, TD children/youth, and  
90 neurotypical adults:

- 91 1. Investigate brain activity during the preparation stage before executing a sequential manual  
92 task
- 93 2. Investigate brain activity during the preparation stage before observing a sequential manual  
94 task
- 95 3. Investigate overlapping brain activity during the respective preparation stage before  
96 executing and observing a sequential manual task
- 97 4. Investigate brain activity during execution of a sequential manual task

- 98           5. Investigate brain activity during observation of a sequential manual task
- 99           6. Investigate overlapping brain activity during execution and observation of a sequential
- 100           manual task

101 Additional aims include exploring outcomes and group differences associated with behavioral

102 execution measures collected in the scanner (latency, duration) in relation to brain activity (including

103 motor variability in ASD), behavioral measures collected outside the scanner (fluid intelligence,

104 working memory, cognitive planning, fine motor performance) in relation to brain activity, cerebral

105 functional connectivity in resting state functional MRI (rs-fMRI) in relation to functional brain activity,

106 and diffusion tensor imaging (DTI) and Synthetic MR (SyMR), respectively, in relation to brain activity.

107 Moreover, employing a longitudinal approach will allow investigation of developmental changes in

108 the children/youth in relation to the stated aims.

#### 109 *Hypotheses*

110 Anticipatory planning of movement involves associated activity in frontal brain areas for processing

111 of action plans, and parietal brain areas for monitoring of action outcomes [16]. Planning of object-

112 directed action sequences has been found to further engage occipitotemporal cortex [9-10]. In

113 relation to the main aims, we thus expect to find preparative processing in frontoparietal and

114 occipitotemporal cortical areas, with possible overlap between task execution and observation. The

115 MNS, involving premotor cortex, inferior parietal lobe, primary motor and somatosensory cortex

116 [17], is expected to be engaged during task observation. We further hypothesize that while regional

117 activations may be largely similar between groups, intensity and direction of activity will differ

118 depending on ASD diagnosis (ASD vs. TD) and age (TD vs. adults). In addition, both structural

119 cerebellar abnormalities and atypical motor-related functional activation of the cerebellum are

120 commonly reported in ASD [7]. Action prediction depends on the integrity of a cortico-cerebellar

121 loop, from posterior parietal cortex via the cerebellum and back to premotor and motor brain

122 regions [4, 18]. The cerebellum has further been implicated in functions outside the sensorimotor

123 domain, including executive functioning and social cognition [19]. Therefore, we further expect  
124 different cerebellar activation patterns in children/youth with ASD compared to TD controls.

## 125 **Materials and Methods**

### 126 Study design

127 The study involves both a cross-sectional and longitudinal approach to investigate differences and  
128 commonalities in neural processing during execution and observation of visually guided goal-directed  
129 sequential manual movements at two time points (T1-T2) in children/youth with ASD and TD  
130 children/youth, also as compared with neurotypical adults (gold standard for fully developed task-  
131 related predictive ability) at T1. Presently, participant recruitment and data collection have been  
132 initiated, but as requested for a study protocol and in compliance with PLOS data policy, no data has  
133 been included. Table 1 outlines the assessments covered by the study, and the timeline for the study  
134 (Gantt chart) is depicted in Figure 1.

135 **Table 1.** Cognitive, motor and brain imaging assessments. T1, assessment time point 1; T2,  
136 assessment time point 2.

137 **Figure 1.** Timeline for study recruitment, assessments, and data preparation and analyses.

### 138 Ethical approval

139 The study was approved by the Swedish Ethical Review Authority (ref: 2022-01513-01) and is  
140 conducted in accordance with the Declaration of Helsinki.

### 141 Participants

142 A total of 30 neurotypical adults (18-40 years) and 40 children/youth (20 ASD, 20 TD; 12-16 years)  
143 will be recruited. The 12–16 years age span was chosen because these children/youth are old enough  
144 to manage a complex sequential motor task in the scanner but have not yet developed an adult level  
145 of dexterity. Sample sizes are in keeping with, or larger than most similar previous fMRI studies and

146 can be considered acceptable in terms of generating sufficient statistical power [20]. Inclusion  
147 criteria for the adults and the TD children/youth are language fluency in Swedish, normal or  
148 corrected-to-normal vision, and no diagnosed neuropsychiatric or motor disability. Inclusion criteria  
149 for the children with ASD are an ASD diagnosis established within the Swedish health care system, no  
150 diagnosed intellectual disability, and language fluency in Swedish. Exclusion criteria for all groups are  
151 non-compliance with the testing protocol, metal objects in the body (implanted or otherwise), or  
152 pregnancy. A specific exclusion criterium for the adults, but not the children/youth, is left-  
153 handedness. The children with ASD are recruited through records from the Habilitation Centre,  
154 Region Västerbotten, Sweden. Families are contacted by the Habilitation Centre and asked if the  
155 researchers may contact them and inform them about the study. If they agree, the families receive a  
156 participant information letter followed by a telephone call to ensure verbal information and answers  
157 to questions. The TD children and adults are recruited through advertisements in the Umeå region  
158 and by convenience sampling. Families of TD children and adult participants also receive a participant  
159 information letter followed by an e-mail or a telephone call. Of particular relevance for  
160 children/youth with ASD, the information letter also refers to a dedicated home page with pictures  
161 and videos of study premises, people involved in the study, and what participants are supposed to  
162 do. Recruitment started October 2023. Assent from the child and written, informed consent from  
163 both parents/caregivers are collected for all child participants. Written, informed consent is also  
164 collected from children/youth aged 15 years or older and from adult participants.

## 165 Equipment

166 For the fMRI execution task, two identical sets of custom-made wooden equipment were built  
167 (Figure 2), one for practicing and one for use in the MR scanner. The equipment, purposely designed  
168 for the study, consists of a wooden box with two compartments where a standard fMRI 4-button  
169 response box (Current Designs) can be fitted. The top covering the wooden compartment has two  
170 vertically aligned holes to the left side (for a right-handed participant), corresponding to buttons 1

171 and 4 on the fMRI response box underneath, and a T-shaped frame made of braided wool yarn glued  
172 to the surface in a 30° clockwise rotational angle to the right side. Adjustment to a left-handed  
173 participant can be made by exchanging the top for another where the holes are situated to the right,  
174 the T-frame to the left, and using the second compartment of the wooden box. The T-frame  
175 corresponds to a wooden object consisting of a cube (1.5 x 1.5cm) with four cylinders (length: 4cm,  
176 diameter: 1.5 cm) glued to the cube (Figure 2). The cylinders are in four different colors: One yellow  
177 (corresponding to the vertical part of the “T”), one black (horizontal right side of the “T”, facing  
178 upwards toward the top button), one red (horizontal left side of the “T”, facing downwards toward  
179 the button below), and one blue (facing the participant).

180 **Figure 2.** The equipment (for right-handed participants): wooden box with fMRI 4-button response  
181 box fitted into compartment, top display with holes corresponding to buttons 1 (blue) and 4 (red)  
182 and T-shaped frame with the wooden object inserted.

### 183 Experimental task

184 The fMRI execution task consists of, holding the yellow cylinder, using the cylinders of the wooden  
185 object to sequentially press the top button first, then the second button below, and then return the  
186 object to the frame. The top button is always pressed by the black cylinder, while the second button  
187 can be required to be pressed by either the black, red, blue or yellow cylinder. Pressing black-black,  
188 where no rotation of the object is needed between buttons, requires less motor planning and  
189 constitutes the baseline (“baseline trials”). Pressing black-red/blue/yellow requires a complex  
190 rotation of the object, and therefore increased motor planning is demanded for correct performance  
191 (“complex trials”).

192 For the fMRI observation task, short video clips of a hand, holding the yellow cylinder, moving the  
193 wooden object to press black-black, black-red, black-blue, and black-yellow, respectively, were  
194 recorded. The videos show the execution of the trials from the same view as when the participants  
195 perform the task themselves (first-person view). To stimulate engagement in the observation task,



196 two exclusive videos for each of the four respective trial variants were recorded (i.e. offering a slight  
197 variation between videos). Schematic illustrations including measures of the equipment (top display  
198 and compartment) and the wooden object are added in Supplementary Information (Figures S1-S3),  
199 along with one example of the observation task videos (S4).

200 As shown in Figure 3, the task structure is as follows: First, delivered by a dedicated custom-made  
201 PsychoPy script, the participant receives a cue depicting (i) condition (execution/hand or  
202 observation/eye) and (ii) a schematic image of the top display (the object with the differently colored  
203 cylinders in starting position and the two holes) with the color of the holes indicating which of the  
204 colored cylinders that are required to press the buttons (e.g. black-blue). During cue presentation  
205 (5s), which constitutes the preparation stage, the participant is asked to either think about how to  
206 perform the movement (execution task) or prepare to watch a video of the movement (observation  
207 task). The cue is followed by a delay (2-10s inter-stimulus-interval, ISI, including a probe to either  
208 look at hand or continue to watch the screen), a subsequent auditive start signal, and then either  
209 execution or observation of the manual task.

210 **Figure 3.** The fMRI task structure and trial procedure. ITI, inter-trial interval.

211 In the execution condition, responses (button presses) are logged by the fMRI response box  
212 underneath the top display, with the final response (second hole) determining end of trial. If no  
213 response is logged within 10s, the trial ends automatically. After this, another delay (2-10s inter-trial-  
214 interval, ITI) is administered before the next cue is presented. A total of 48 trials, 24 baseline and 24  
215 complex, are administered for execution and observation, respectively.

### 216 Data collection

217 Participation in this study comprises two sessions (Figure 4), one practicing session (1.5 hours in  
218 total) and one fMRI session (2 hours in total). Time between practicing and fMRI may vary but is no  
219 longer than 2 weeks. Before data collection, the participants (and/or caregivers of young  
220 participants) complete a brief questionnaire providing demographic information and a modified

221 version of the Edinburgh Handedness Inventory [21]. To investigate the presence of autistic traits  
222 among the adults, adult participants are asked to fill out a screening questionnaire (Autism Spectrum  
223 Quotient, AQ).

224 **Figure 4.** Overview of the study sessions. \* denotes populations that are included at assessment time  
225 point 1 (T1) and 2 (T2), respectively. Photo of MR scanner by Mikael Stiernstedt.

#### 226 *Practicing*

227 The practicing session takes place at the Department of Psychology, Umeå University, and include (i)  
228 priming in a mock scanner (realistic model of a real MR scanner with recorded noise), (ii) learning the  
229 sequential manual task and the fMRI protocol, and (iii) behavioral assessments (Table 1). The priming  
230 in the mock scanner allows the participants to familiarize themselves with lying in a MR scanner.

231 Also, if the participant should experience claustrophobia, participation can be ruled out from the very  
232 beginning. For practicing the sequential manual task, a wooden equipment (see Equipment above)  
233 and a 4-button response box (same as the fMRI response box but adapted for use outside the  
234 scanner) attached to a laptop computer are utilized. The same PsychoPy script as described above is  
235 employed, although total number of trials is reduced to 8 trials, 2 baseline and 6 complex (2 of each  
236 color red/blue/yellow), for execution, and 4 trials, 1 baseline and 3 complex (1 of each color  
237 red/blue/yellow) for observation. Prior to practicing, the participant receives verbal instructions  
238 (supported by pictures of the cues). If needed, additional instructions and support are also provided  
239 during the practicing. In addition, the participant is given an illustrated instruction sheet to take  
240 home and read before the fMRI session. For execution trials, particular emphasis is placed on  
241 thinking about how to perform the movement during the execution/hand cue, on looking down at  
242 the top display/own hand during the ISI, and on waiting for the auditory signal to start. These  
243 instructions are important to avoid simply using color pattern memorizing and to avoid  
244 contaminating task execution brain engagement with activity due to re-directing gaze from the  
245 screen to the hand. For observation trials, particular emphasis is put on holding the hand still while

246 watching the video clip, to avoid brain activity linked to hand use contaminating task observation  
247 activations. Finally, behavioral assessments (Table 1) are carried out in a dedicated test room by, or  
248 under supervision by, a licensed psychologist (ED). Both cognitive and fine motor general functioning  
249 are important for the manual task studied. Associations between cognitive functions and motor  
250 planning and performance have also been reported in ASD [22-23]. Therefore, these assessment  
251 outcomes are collected for comparative purposes and for use as covariates in the analyses.

### 252 *fMRI investigation*

253 The fMRI session takes place at the Umeå center for Functional Brain Imaging (UFBI)/MR-center at  
254 Umeå University Hospital, utilizing a 3T MR scanner. Prior to entering the scanner, the instructions  
255 are once more gone through, and any minor visual impairment is corrected by fitting of dedicated  
256 fMRI goggles. The MR staff additionally inform the participant about the MR procedure. To ensure  
257 protection from the loud scanner noise and for audio purposes, the participant is provided with  
258 earplugs and ear protectors. The participant is placed in the MR scanner with the head raised 27°,  
259 which enables visual guidance of the hand during execution trials and visibility of a computer screen  
260 behind the scanner bore (screen size 88.2 x 48.5cm). The computer screen, which is visible through a  
261 tilted mirror affixed to the head coil (Figure 5), is used to give the instructions during the experiment  
262 and to show videos of the task during observation trials.

263 **Figure 5.** Illustration of a participant lying on the MR bunk with head coil, rack, wedge and equipment  
264 fitted, ready to go into the scanner.

265 A custom-made wooden rack with a screwed on (using brass screws) arched wooden panel, is fitted  
266 on top of the participant. A 15° wooden wedge holding the equipment (secured by velcro) is fitted  
267 onto the panel, allowing individual adjustment of the equipment in either direction. All fittings are  
268 made so that execution of the task can be performed comfortably by each participant. All  
269 participants first perform T1-weighted structural imaging (4:11 min) and fMRI imaging (3x14  
270 minutes), followed by T2\*-weighted imaging (2:05 min), rs-fMRI (6 min), DTI (5:20 min), and SyMR

271 (5:51 min). During scanning, participant heart rate and respiration are monitored, and the participant  
272 can at any time communicate with the MR staff by using an emergency squeeze ball. Instructions are  
273 given to squeeze this ball primarily if feeling discomfort or needing to stop the scan for any reason.

#### 274 MRI data acquisition and preprocessing

275 Image acquisition is made using a 3T GE Discovery MR 750 scanner (General Electrics). T2-\* weighted  
276 images are obtained using a single shot gradient echo planar imaging (EPI) sequence used for Blood-  
277 Oxygen-Level-Dependent (BOLD) imaging. The following parameters are used for the imaging  
278 sequence: echo time: 30ms, repetition time: 2000ms (37 slices acquired), flip angle: 80°, field of view:  
279 25x25cm, 96x96 matrix and 3.4mm slice thickness. A TDI AIR 48 channel SIGNA Premier XT head coil  
280 is used. Ten dummy scans are collected and discarded before the start of the fMRI data collection to  
281 allow for equilibrium of the BOLD-signal.

282 T1-weighted images are obtained using a 3D fast spoiled gradient echo sequence (MP-rage) in axial  
283 orientation. The parameters are: echo time: 30ms, flip angle: 8°, field of view: 24 x 24cm and 0.5mm  
284 slice thickness.

285 Resting-state fMRI data is acquired using the following parameters: echo time: 30ms, repetition time:  
286 2000ms (37 slices acquired), flip angle: 80°, field of view: 25x25cm, 96x96 matrix, slice thickness:  
287 3.4mm, slice spacing: 0.5mm.

288 A 2D MaGiC sequence is used to collect synthetic MRI. The parameters are: Number of echoes: 2,  
289 repetition time: 4803ms (31 slices acquired), field of view: 24 x 24cm, slice thickness: 4mm, slice  
290 spacing: 1mm.

291 All images will be corrected for slice timing and realigned to the first image volume of the series. All  
292 images will be spatially smoothed through DARTEL [24]. The individual T1-images will be segmented,  
293 and a group-specific mean template and individual flow fields will be created using the DARTEL  
294 algorithm. All T1-images will then be normalized using the group-specific template and adjusted to

295 the anatomical space defined by the MNI atlas using SPM12 (Wellcome Department of Cognitive  
296 Neurology, UK). All images will be smoothed using 8.0mm full width and half maximum (FWHM)  
297 Gaussian Filter Kernel. All data will be high-pass filtered (128s cutoff period) to remove low  
298 frequency noise. The fMRI data will be analyzed using SPM12 implemented in Matlab (R2014b)  
299 (Mathworks, Inc., USA) and run through an in-house program (DataZ).

### 300 Outcome measures

#### 301 *Brain imaging*

302 The fMRI-experiments will generate blood oxygen level dependent (BOLD) contrasts for task-related  
303 activity in different brain areas during execution, observation and the preparation stage (before  
304 execution/observation). The T1-weighted structural images will be used to validate a correct  
305 anatomical localization of significant clusters of activation and local maxima. To elucidate normal and  
306 abnormal functional connectivity between different brain regions, we will use resting-state fMRI (rs-  
307 fMRI) that measure spontaneous low-frequency fluctuations in the BOLD signal, where functionally  
308 related regions may exhibit correlations in activity. The structural connectivity between brain regions  
309 will be investigated by diffusion tensor imaging (DTI) that measures the anisotropic diffusion of water  
310 molecules in white matter fibre tracts (tractography). Finally, synthetic MR (SyMR) is included in the  
311 study protocol because it rapidly measures tissue properties that enables several different contrasts  
312 to be generated. These contrasts will be used to investigate structural brain differences between  
313 groups, and developmental changes enabled by our longitudinal approach.

#### 314 *Behavior*

315 During the practicing session we will quantitatively measure both cognitive and fine motor general  
316 functioning. The cognitive measurements include fluid intelligence (Wechsler Adult Intelligence Scale,  
317 Fourth Edition/WAIS-IV and Wechsler Intelligence Scale for Children, Fifth Edition/WISC-V), working  
318 memory (WAIS-IV, WISC-V and Corsi Block-Tapping Test) and cognitive planning (Delis-Kaplan  
319 Executive Functions System/D-KEFS). Fine motor performance level will be measured with the

320 Grooved Pegboard Test. During the fMRI session we will measure behavioral parameters during task  
321 execution, such as the latency between the start signal and the first button press, and the duration  
322 between button presses.

### 323 MRI data analysis

324 General linear models will be created based on eight effects of interest (*preparation stage*: execute  
325 baseline, execute complex, observe baseline, observe complex; *execution/observation*: execute  
326 baseline, execute complex, observe baseline, observe complex) and effects of no interest related to  
327 events for ITI and ISI. All regressors except the six movement parameters will be convolved with a  
328 hemodynamic response function. Each event will be modeled from onset to offset. The time when an  
329 event appears on the screen is defined as onset, and response times will be used as offset. The  
330 durations will be variable to allow the analyses to capture the complete process of preparation,  
331 execution and observation, which could differ from time to time.

332 In the first level, estimations will be made separately for each participant, and a *t*-contrast will be  
333 created for all effects of interest. The *t*-contrasts defined at the first level will then be taken into a  
334 second-order group level analysis, and inferential statistics (*t*-tests, conjunction analyses, ANOVAs  
335 and exploratory whole-brain correlations) will be used to answer the research questions.

336 Additionally, measures from the behavioral assessment, age, sex and response times will be used as  
337 covariates in the analyses to evaluate effects related to individual differences. Preprocessed resting  
338 state data and DTI data will also be analyzed related to the research questions. Additionally,  
339 exploratory analyses will be made using synthetic MR data. Finally, the in-house program DataZ (run  
340 through SPM 12) will be used to analyze longitudinal data associated with the main task, DTI, rs-fMRI  
341 and SyMR.

342 The statistical analyses will be corrected for multiple comparisons ( $p < 0.05$  FDR,  $p < 0.05$  FWE) at the  
343 voxel level.

### 344 Behavioral statistical analyses

345 All behavioral measures (e.g. fine motor performance level or latency between the start signal and  
346 the first button press) will be analyzed using ANOVAs for comparisons of between-subject factors  
347 (our three participant groups) and within-subject factors (such as baseline trials vs complex trials). In  
348 all tests,  $p < 0.05$  will be considered statistically significant.

#### 349 Data management

350 The study involves information classification, risk- and vulnerability analysis based on best practice  
351 according to the Swedish Civil Contingencies Agency, and a plan for data storage/liquidation. In  
352 keeping with the European Union General Data Protection Regulation (GDPR) and national guidelines  
353 for the storing of personal data, an exclusive secure file area for the study has been set up, governed  
354 by the Umeå University IT department. Data collection has been started but no datasets have yet  
355 been generated or analyzed. In accordance with GDPR and Data Protection Act 2018, data will be de-  
356 identified as soon as practically possible. All data are pseudonymized, using a specific study code for  
357 each participant. Data obtained from the MR scanner sessions are stored in a secure computer  
358 database kept at the UFBI. Additional background and behavioral data collected outside the scanner  
359 are securely kept in a safety cabinet in a locked laboratory at the Department of Psychology, Umeå  
360 University. Only those directly involved in the project have access to data. De-identified data  
361 originating from this study will be made available upon completion and shared with the scientific  
362 community.

#### 363 **Discussion**

364 Motor performance difficulties are frequently observed in ASD and have also been linked to autism  
365 core symptoms such as deficits in social interaction. Possibly, an impaired predictive ability is the key  
366 common denominator across these different domains. To investigate this, sensory-motor behaviors  
367 are a particularly useful source of information because they are possible to accurately quantify and  
368 reproduce. Despite this usefulness, and despite the immediate importance of understanding the core  
369 neurodevelopmental processes in autism, there is to date a shortage of fMRI studies exploring actual

370 movement performance in individuals with ASD. In particular, there is a lack of studies involving  
371 direct eye-hand coordination, more complex movements that require predictive ability, and a  
372 developmental (longitudinal) design. One obvious explanation for this sparsity is the challenges  
373 involved in investigating movement using a method where participants, preferably lying supine in the  
374 scanner, should move as little as possible.

375 There are, however, an increasing number of fMRI studies proving the feasibility of exploring actual  
376 goal-directed eye-hand action in adult participants [9, 25]. Through these types of studies, we can  
377 gain important knowledge about how brain areas supporting visual processing, motor planning,  
378 sensory-motor integration and predictive control are engaged in actions that mimic those that we  
379 perform in everyday life. At present, there is also a growing body of evidence showing that children  
380 and adolescents, both TD and those with neurodevelopmental conditions, successfully can partake in  
381 fMRI studies including those involving a motor task [7, 26]. In the framework of the present study,  
382 learning more about the neurobiological characterization of goal-directed sensory-motor behavior,  
383 predictive functioning and the observation of other's action in young participants with ASD,  
384 preferably over time, could add importantly to the understanding of core issues in autism.

#### 385 **Authors' contributions**

386 Conceptualization: Erik Domellöf, Hanna Hjärtström, Anna-Maria Johansson, Thomas Rudolfsson,  
387 Sara Stillesjö, Daniel Säfström

388 Data curation: Erik Domellöf, Hanna Hjärtström, Anna-Maria Johansson, Thomas Rudolfsson, Sara  
389 Stillesjö, Daniel Säfström

390 Formal analysis: Hanna Hjärtström, Sara Stillesjö

391 Funding acquisition: Erik Domellöf

392 Investigation: Erik Domellöf, Hanna Hjärtström, Anna-Maria Johansson, Thomas Rudolfsson, Sara  
393 Stillesjö, Daniel Säfström



394 Methodology: Erik Domellöf, Hanna Hjärtström, Anna-Maria Johansson, Thomas Rudolfsson, Sara

395 Stillesjö, Daniel Säfström

396 Project administration: Erik Domellöf, Hanna Hjärtström, Anna-Maria Johansson, Thomas Rudolfsson,

397 Sara Stillesjö, Daniel Säfström

398 Software: Hanna Hjärtström, Sara Stillesjö

399 Supervision: Erik Domellöf, Anna-Maria Johansson, Thomas Rudolfsson, Sara Stillesjö, Daniel

400 Säfström

401 Writing - original draft: Erik Domellöf

402 Writing - review and editing: Erik Domellöf, Hanna Hjärtström, Anna-Maria Johansson, Thomas

403 Rudolfsson, Sara Stillesjö, Daniel Säfström

#### 404 **Acknowledgements**

405 We are grateful to the Habilitation Centre, Region Västerbotten, to UFBI, and to the Knut and Alice

406 Wallenberg Foundation for supporting this study. We further thank the MR staff at the Umeå

407 University Hospital and Andreas Johansson for their excellent work regarding the ongoing data

408 collection.

#### 409 **Supporting Information**

410 **S1 Figure.** Schematic illustration of the equipment top display (1:1 scale).

411 **S2 Figure.** Schematic illustration of the equipment box with compartments (1:2 scale), and 3D

412 drawing including measures of box base plate and side heights (not to scale).

413 **S3 Figure.** Schematic illustration of the wooden object (not to scale).

414 **S4 Video.** Example of observation task video (baseline trial).

#### 415 **References**

- 416 1. Coll SM, Foster NEV, Meilleur A, Brambati SM, Hyde KL. Sensorimotor skills in autism  
417 spectrum disorder: a meta-analysis. *Res Autism Spectr Disord.* 2020;76: 101570. doi:  
418 10.1016/j.rasd.2020.101570.
- 419 2. Bäckström A, Johansson AM, Rudolfsson T, Rönqvist L, von Hofsten C, Rosander K, Domellöf  
420 E. Motor planning and movement execution during goal-directed sequential manual  
421 movements in 6-year-old children with autism spectrum disorder: a kinematic analysis. *Res*  
422 *Dev Disabil.* 2021;115: 104014. doi: 10.1016/j.ridd.2021.104014.
- 423 3. Cavallo A, Romeo L, Ansuini C, Battaglia F, Nobili L, Pontil M, et al. Identifying the signature of  
424 prospective motor control in children with autism. *Sci Rep.* 2021;11: 3165. doi:  
425 10.1038/s41598-021-82374-2.
- 426 4. Von Hofsten C, Rosander, K. Perception-action in children with ASD. *Front Integr Neurosci.*  
427 2012;6: 115. <https://doi.org/10.3389/fnint.2012.00115>.
- 428 5. Cannon J, O'Brien AM, Bungert L, Sinha P. Prediction in autism spectrum disorder: a  
429 systematic review of empirical evidence. *Autism Res.* 2021;14(4): 604-630. doi:  
430 10.1002/aur.2482.
- 431 6. Trevarthen C, Delafield-Butt JT. Autism as a developmental disorder in intentional movement  
432 and affective engagement. *Front Integr Neurosci.* 2013;7: 49. doi: 10.3389/fnint.2013.00049.
- 433 7. Mostofsky SH, Powell SK, Simmonds DJ, Goldberg MC, Caffo B, Pekar JJ. Decreased  
434 connectivity and cerebellar activity in autism during motor task performance. *Brain.*  
435 2009;132: 2413-2425. doi: 10.1093/brain/awp088.
- 436 8. Kilbreath SL, Heard RC. Frequency of hand use in healthy older persons. *Aus J Physiother*  
437 2005;51: 119-212. doi: 10.1016/s0004-9514(05)70040-4.
- 438 9. Gallivan JP, Johnsrude IS, Flanagan JR. Planning ahead: object-directed sequential actions  
439 decoded from human frontoparietal and occipitotemporal networks. *Cereb Cortex.* 2016;26:  
440 708-730. doi: 10.1093/cercor/bhu302.

- 441 10. Säfström D, Domellöf E. Brain activations supporting linking of action phases in a sequential  
442 manual task. *Neuroimage*. 2018;172: 608-619. doi: 10.1016/j.neuroimage.2018.02.014.
- 443 11. Bonini L, Rotunno C, Arcuri E, Gallese V. Mirror neurons 30 years later: implications and  
444 applications. *Trends Cogn Sci*. 2022;26(9): 767-781. doi: 10.1016/j.tics.2022.06.003.
- 445 12. Fourie E, Palser ER, Pokorny JJ, Neff M, Rivera SM. Neural processing and production of  
446 gesture in children and adolescents with autism spectrum disorder. *Front Psychol*. 2020;10:  
447 3045. doi: 10.3389/fpsyg.2019.03045.
- 448 13. Pokorny JJ, Hatt NV, Colombi C, Vivanti G, Rogers SJ, Rivera SM. The action observation  
449 system when observing hand actions in autism and typical development. *Autism Res*.  
450 2015;8(3): 284-296. doi: 10.1002/aur.1445.
- 451 14. Pokorny JJ, Hatt NV, Rogers SJ, Rivera SM. What are you doing with that object? Comparing  
452 the neural responses of action understanding in adolescents with and without autism. *J*  
453 *Autism Dev Disord*. 2018;48(3): 809-823. doi: 10.1007/s10803-017-3338-3.
- 454 15. Knaus TA, Burns CO, Kamps J, Foundas AL. Action viewing and language in adolescents with  
455 autism spectrum disorder. *Exp Brain Res*. 2023;241: 559-570. doi: 10.1007/s00221-022-  
456 06540-2.
- 457 16. Haggard P. Sense of agency in the human brain. *Nat Rev Neurosci*. 2017;18(4): 196-207. doi:  
458 10.1038/nrn.2017.14.
- 459 17. Rizzolatti G, Sinigaglia C. The mirror mechanism: a basic principle of brain function. *Nat Rev*  
460 *Neurosci*. 2016;17: 757-765. doi: 10.1038/nrn.2016.135.
- 461 18. Wolpert DM, Miall RC, Kawato M. Internal models in the cerebellum. *Trends Cogn Sci*.  
462 1998;2: 338-347. doi: 10.1016/S1364-6613(98)01221-2.
- 463 19. Sokolov AA, Miall RC, Ivry RB. The cerebellum: adaptive prediction for movement and  
464 cognition. *Trends Cogn Sci*. 2017;21: 313-332. doi: 10.1016/j.tics.2017.02.005.
- 465 20. Pajula J, Tohka J. How many is enough? Effect of sample size in inter-subject correlation  
466 analysis of fMRI. *Comput Intell Neurosci*. 2016: 2094601. doi: 10.1155/2016/2094601.

- 467 21. Oldfield RC. The assessment and analysis of handedness: the Edinburgh inventory.  
468 Neuropsychologia. 1971;9(1): 97-113. doi: 10.1016/0028-3932(71)90067-4.
- 469 22. Ansuini C, Podda J, Battaglia FM, Veneselli E, Becchio C. One hand, two hands, two people:  
470 Prospective sensorimotor control in children with autism. Dev Cogn Neurosci. 2018;29: 86-  
471 96. doi: 10.1016/j.dcn.2017.02.009.
- 472 23. Neely KA, Mohanty S, Schmitt LM, Wang Z, Sweeney JA, Mosconi MW. Motor memory  
473 deficits contribute to motor impairments in autism spectrum disorder. J Autism Dev Disord,  
474 2019;49(7): 2675-2684. doi: 10.1007/s10803-016-2806-5.
- 475 24. Ashburner J. A fast diffeomorphic image registration algorithm. Neuroimage. 2007;38(1): 95-  
476 113. doi: 10.1016/j.neuroimage.2007.07.007.
- 477 25. Rens G, Figley TD, Gallivan JP, Liu Y, Culham JC. Grasping with a twist: dissociating action  
478 goals from motor actions in human frontoparietal circuits. J Neurosci. 2023;43(32): 5831-  
479 5847. doi: 10.1523/JNEUROSCI.0009-23.2023.
- 480 26. Wadsworth HM, Maximo JO, Lemelman AR, Clayton K, Sivaraman S, Deshpande HD, Ver Hof  
481 L, Kana RK. The action imitation network and motor imitation in children and adolescents  
482 with autism. Neuroscience. 2017;343: 147-156. doi: 10.1016/j.neuroscience.2016.12.001.

|                                   | 2023 |  | 2024 |  | 2025 |  | 2026 |  |
|-----------------------------------|------|--|------|--|------|--|------|--|
| Adult recruitment and assessments |      |  |      |  |      |  |      |  |
| Child/youth recruitment           |      |  |      |  |      |  |      |  |
| Child/youth assessments           |      |  |      |  |      |  |      |  |
| Child/youth follow-up recruitment |      |  |      |  |      |  |      |  |
| Child/youth follow-up assessments |      |  |      |  |      |  |      |  |
| Data preparation and analyses     |      |  |      |  |      |  |      |  |

Figure



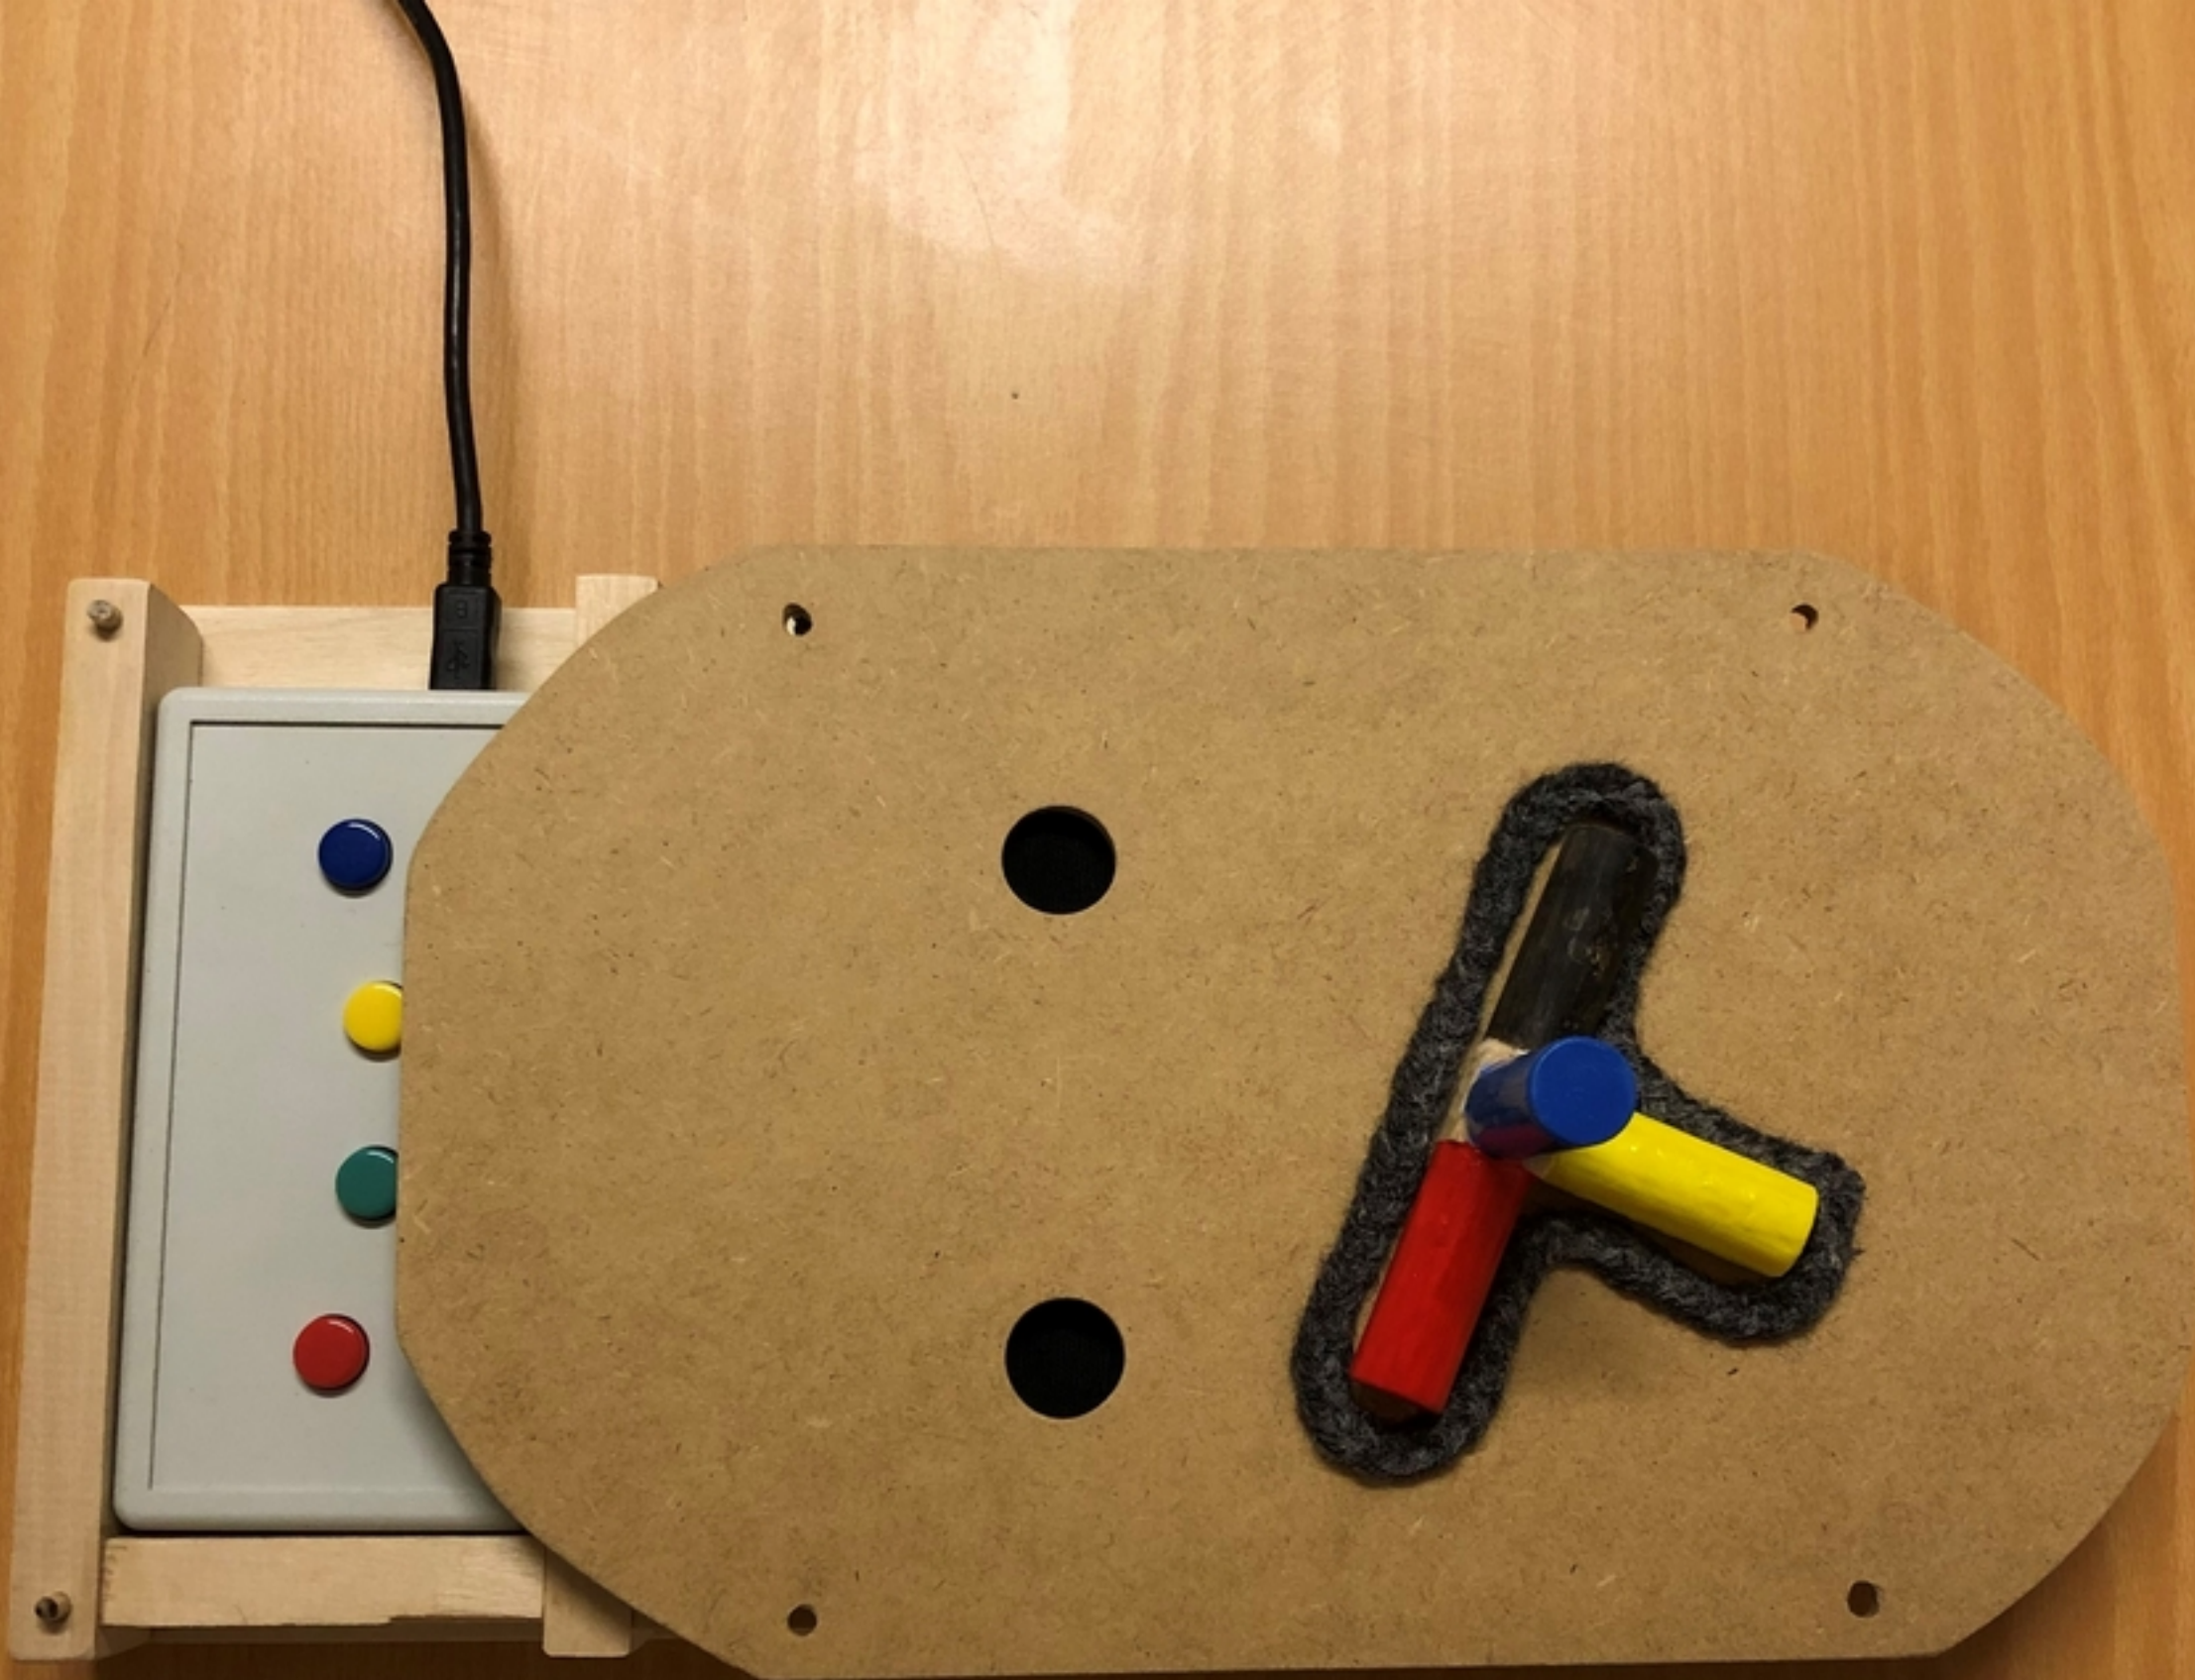

Figure

## Execute

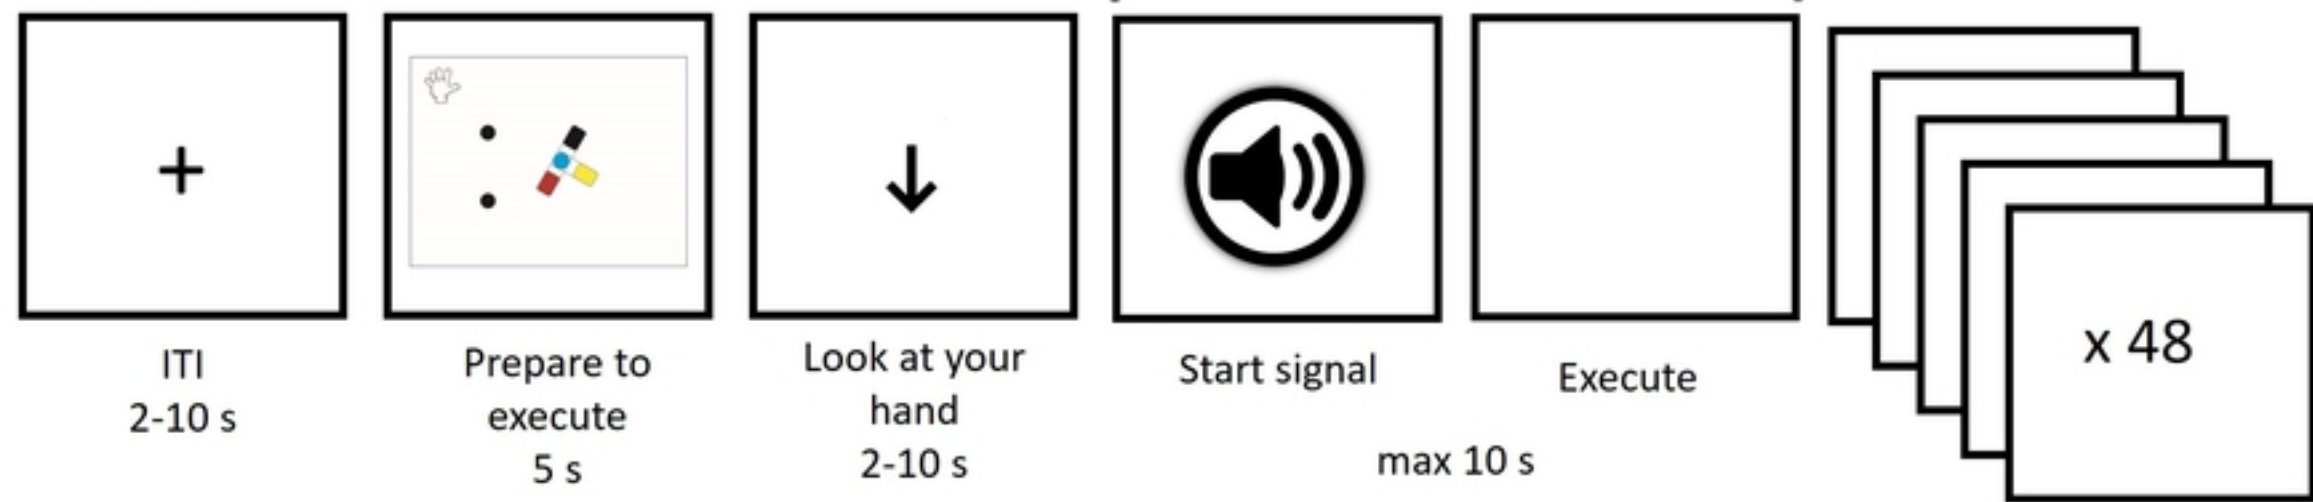

## Observe

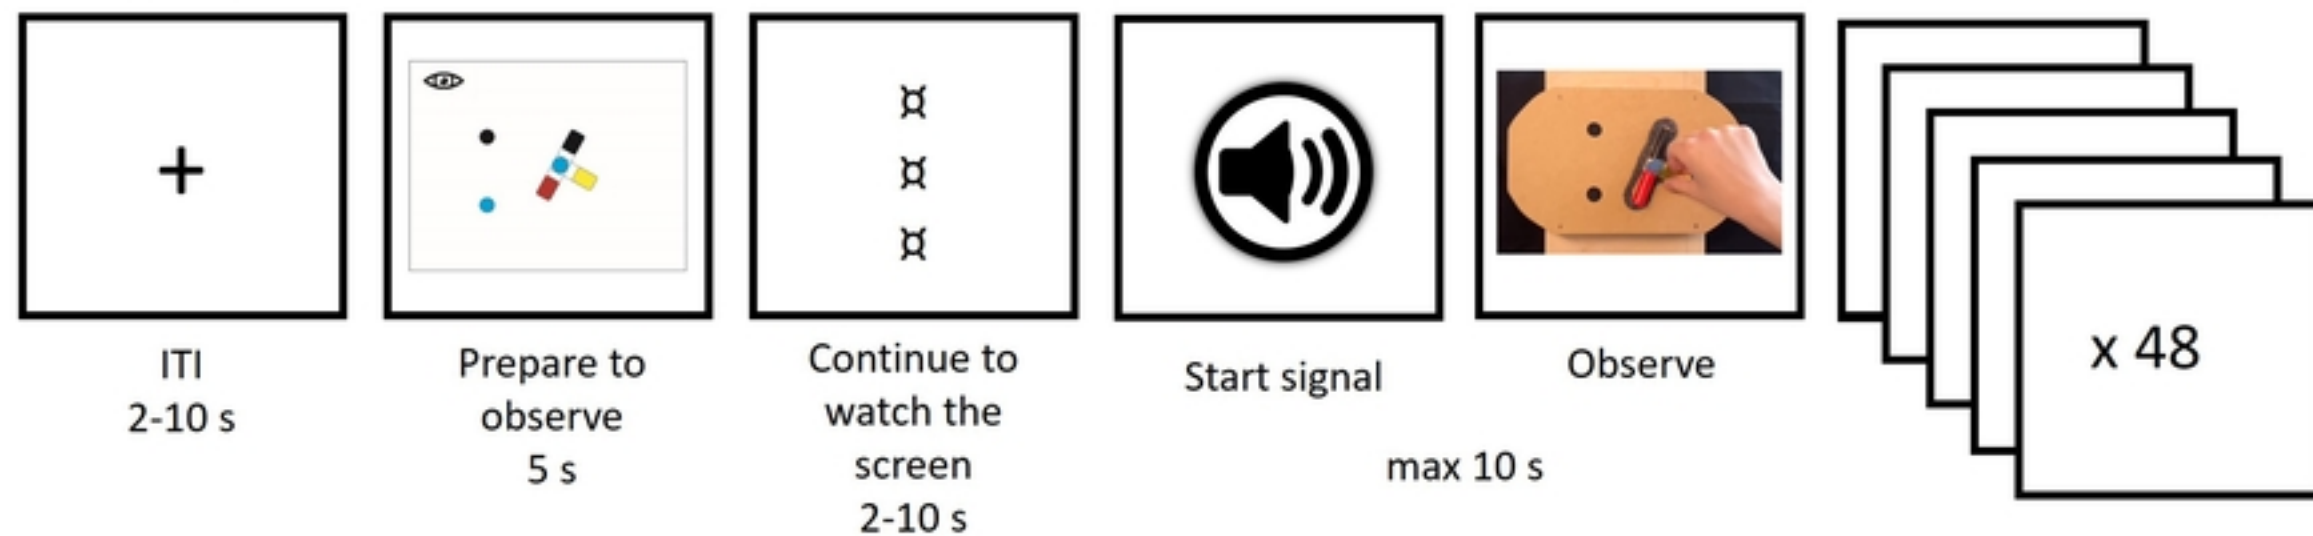

Figure



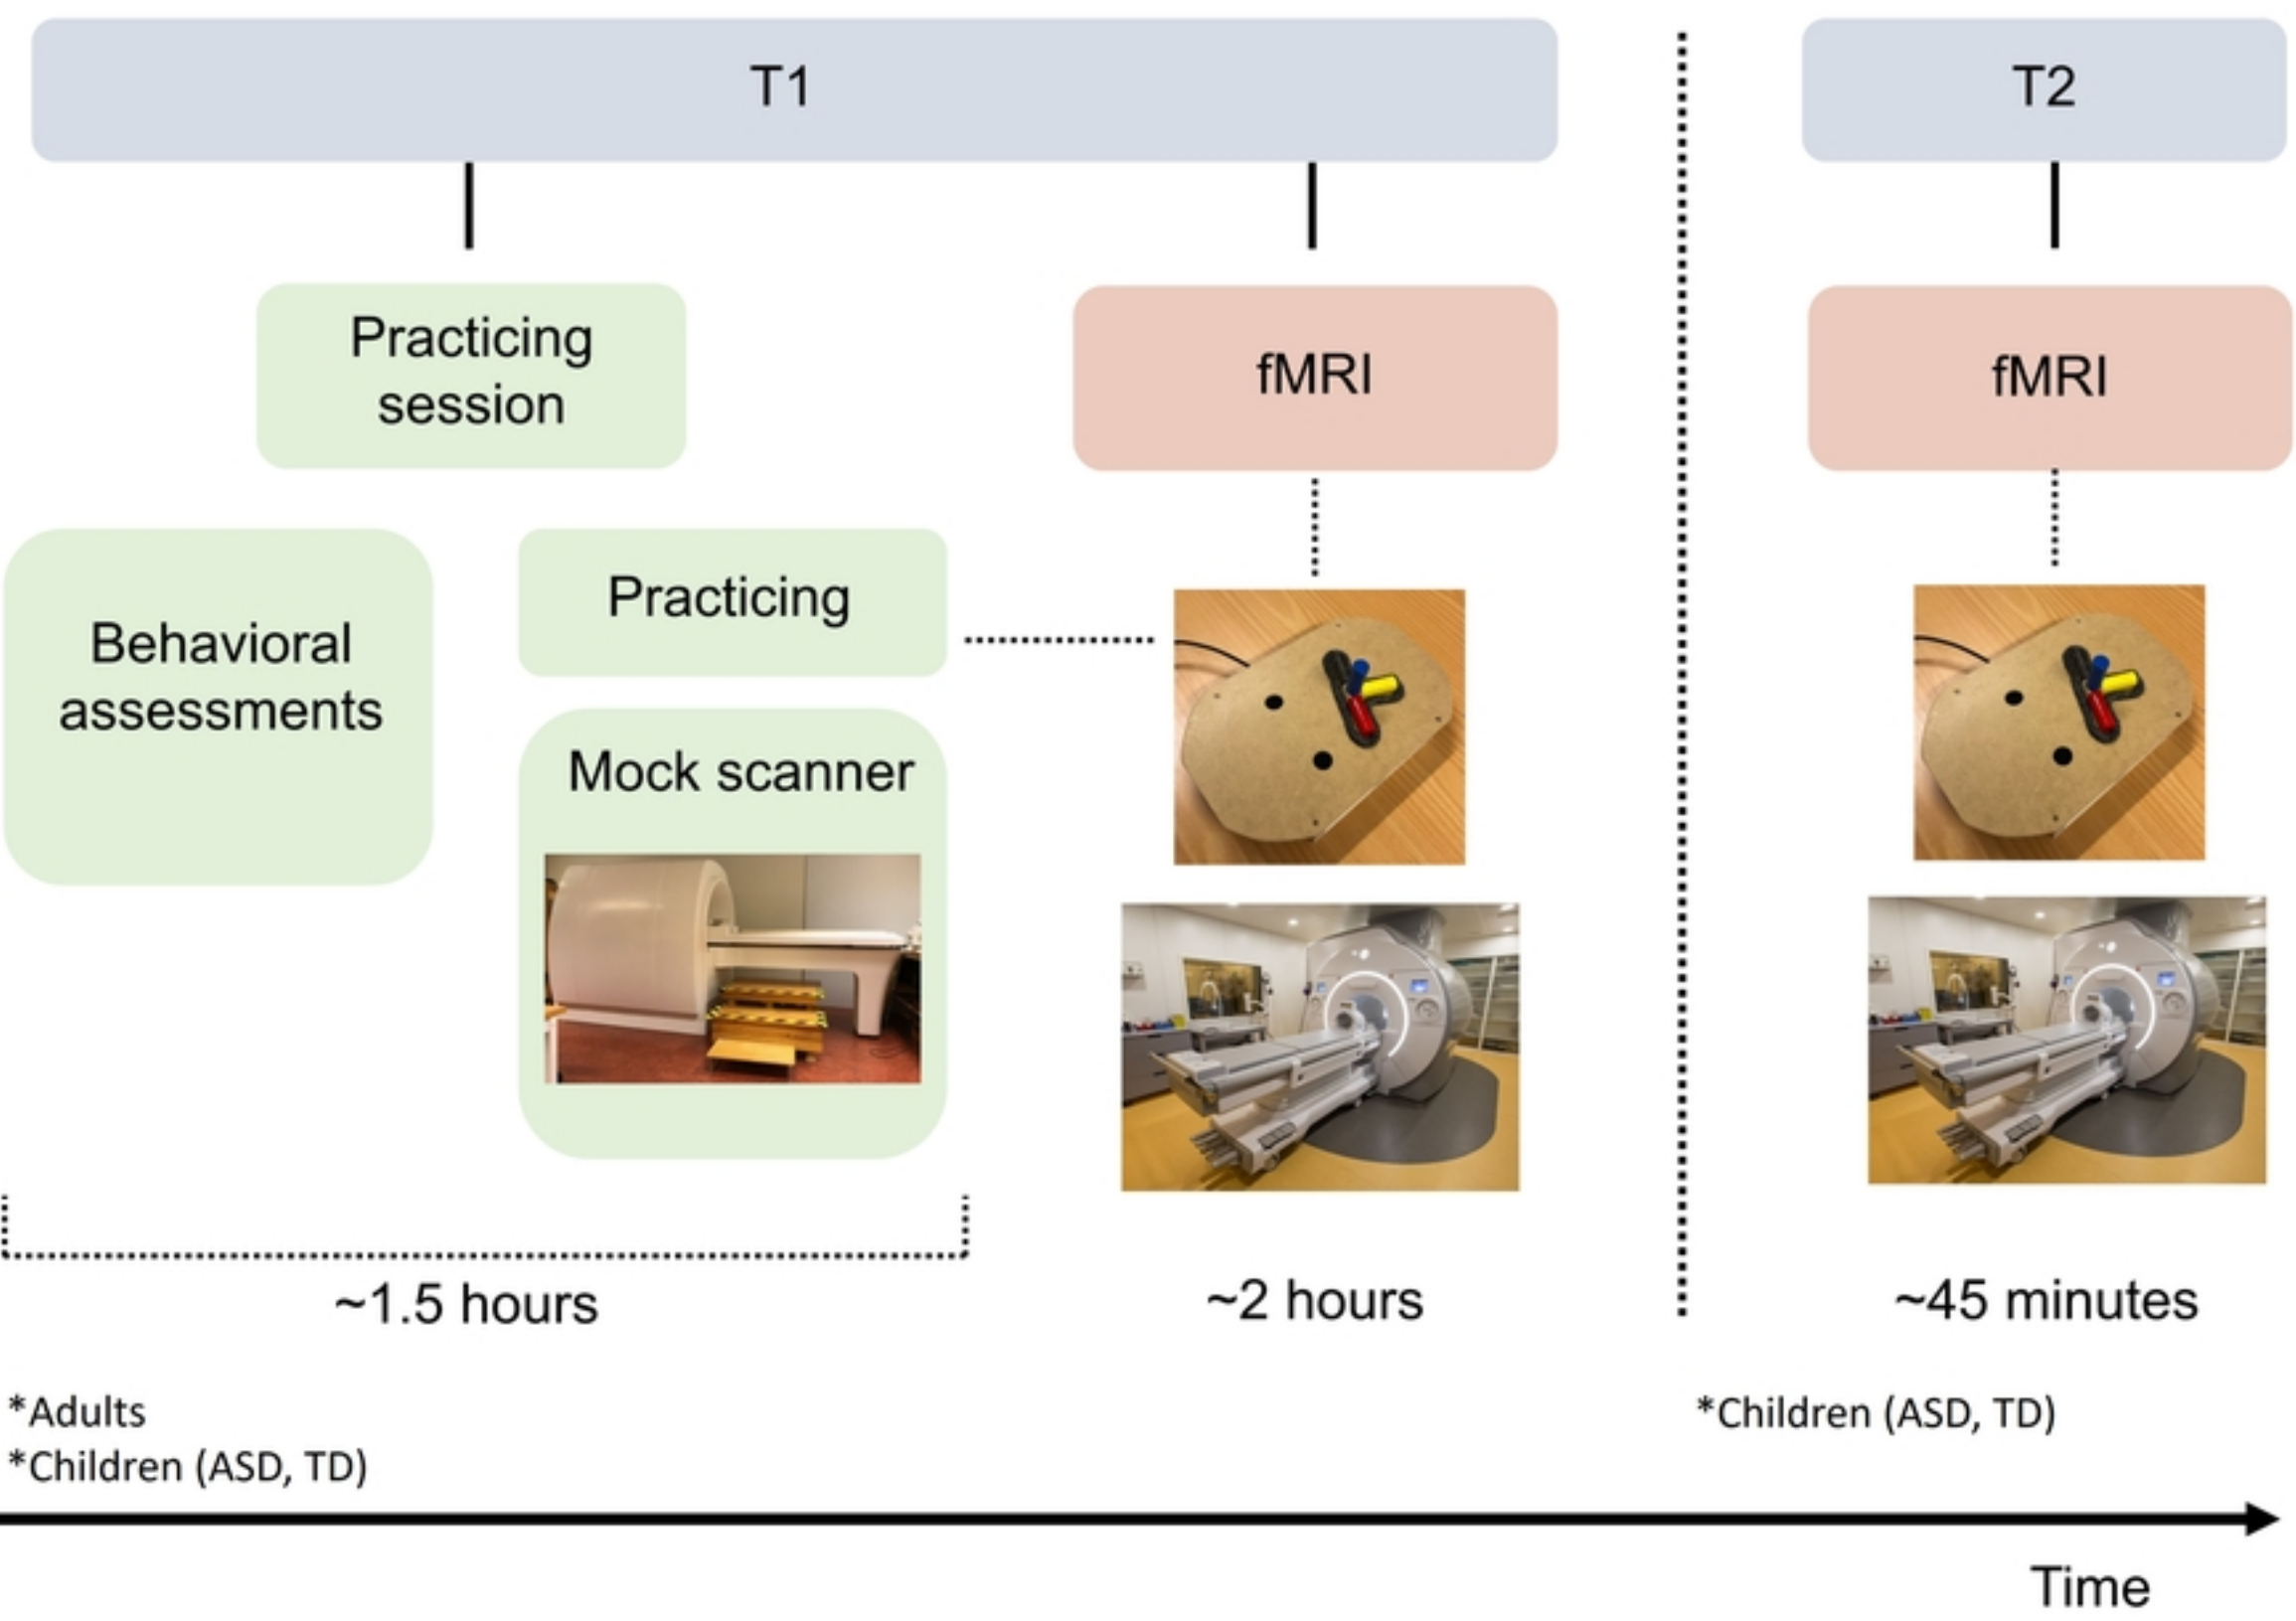

\*Adults  
 \*Children (ASD, TD)

\*Children (ASD, TD)

Figure



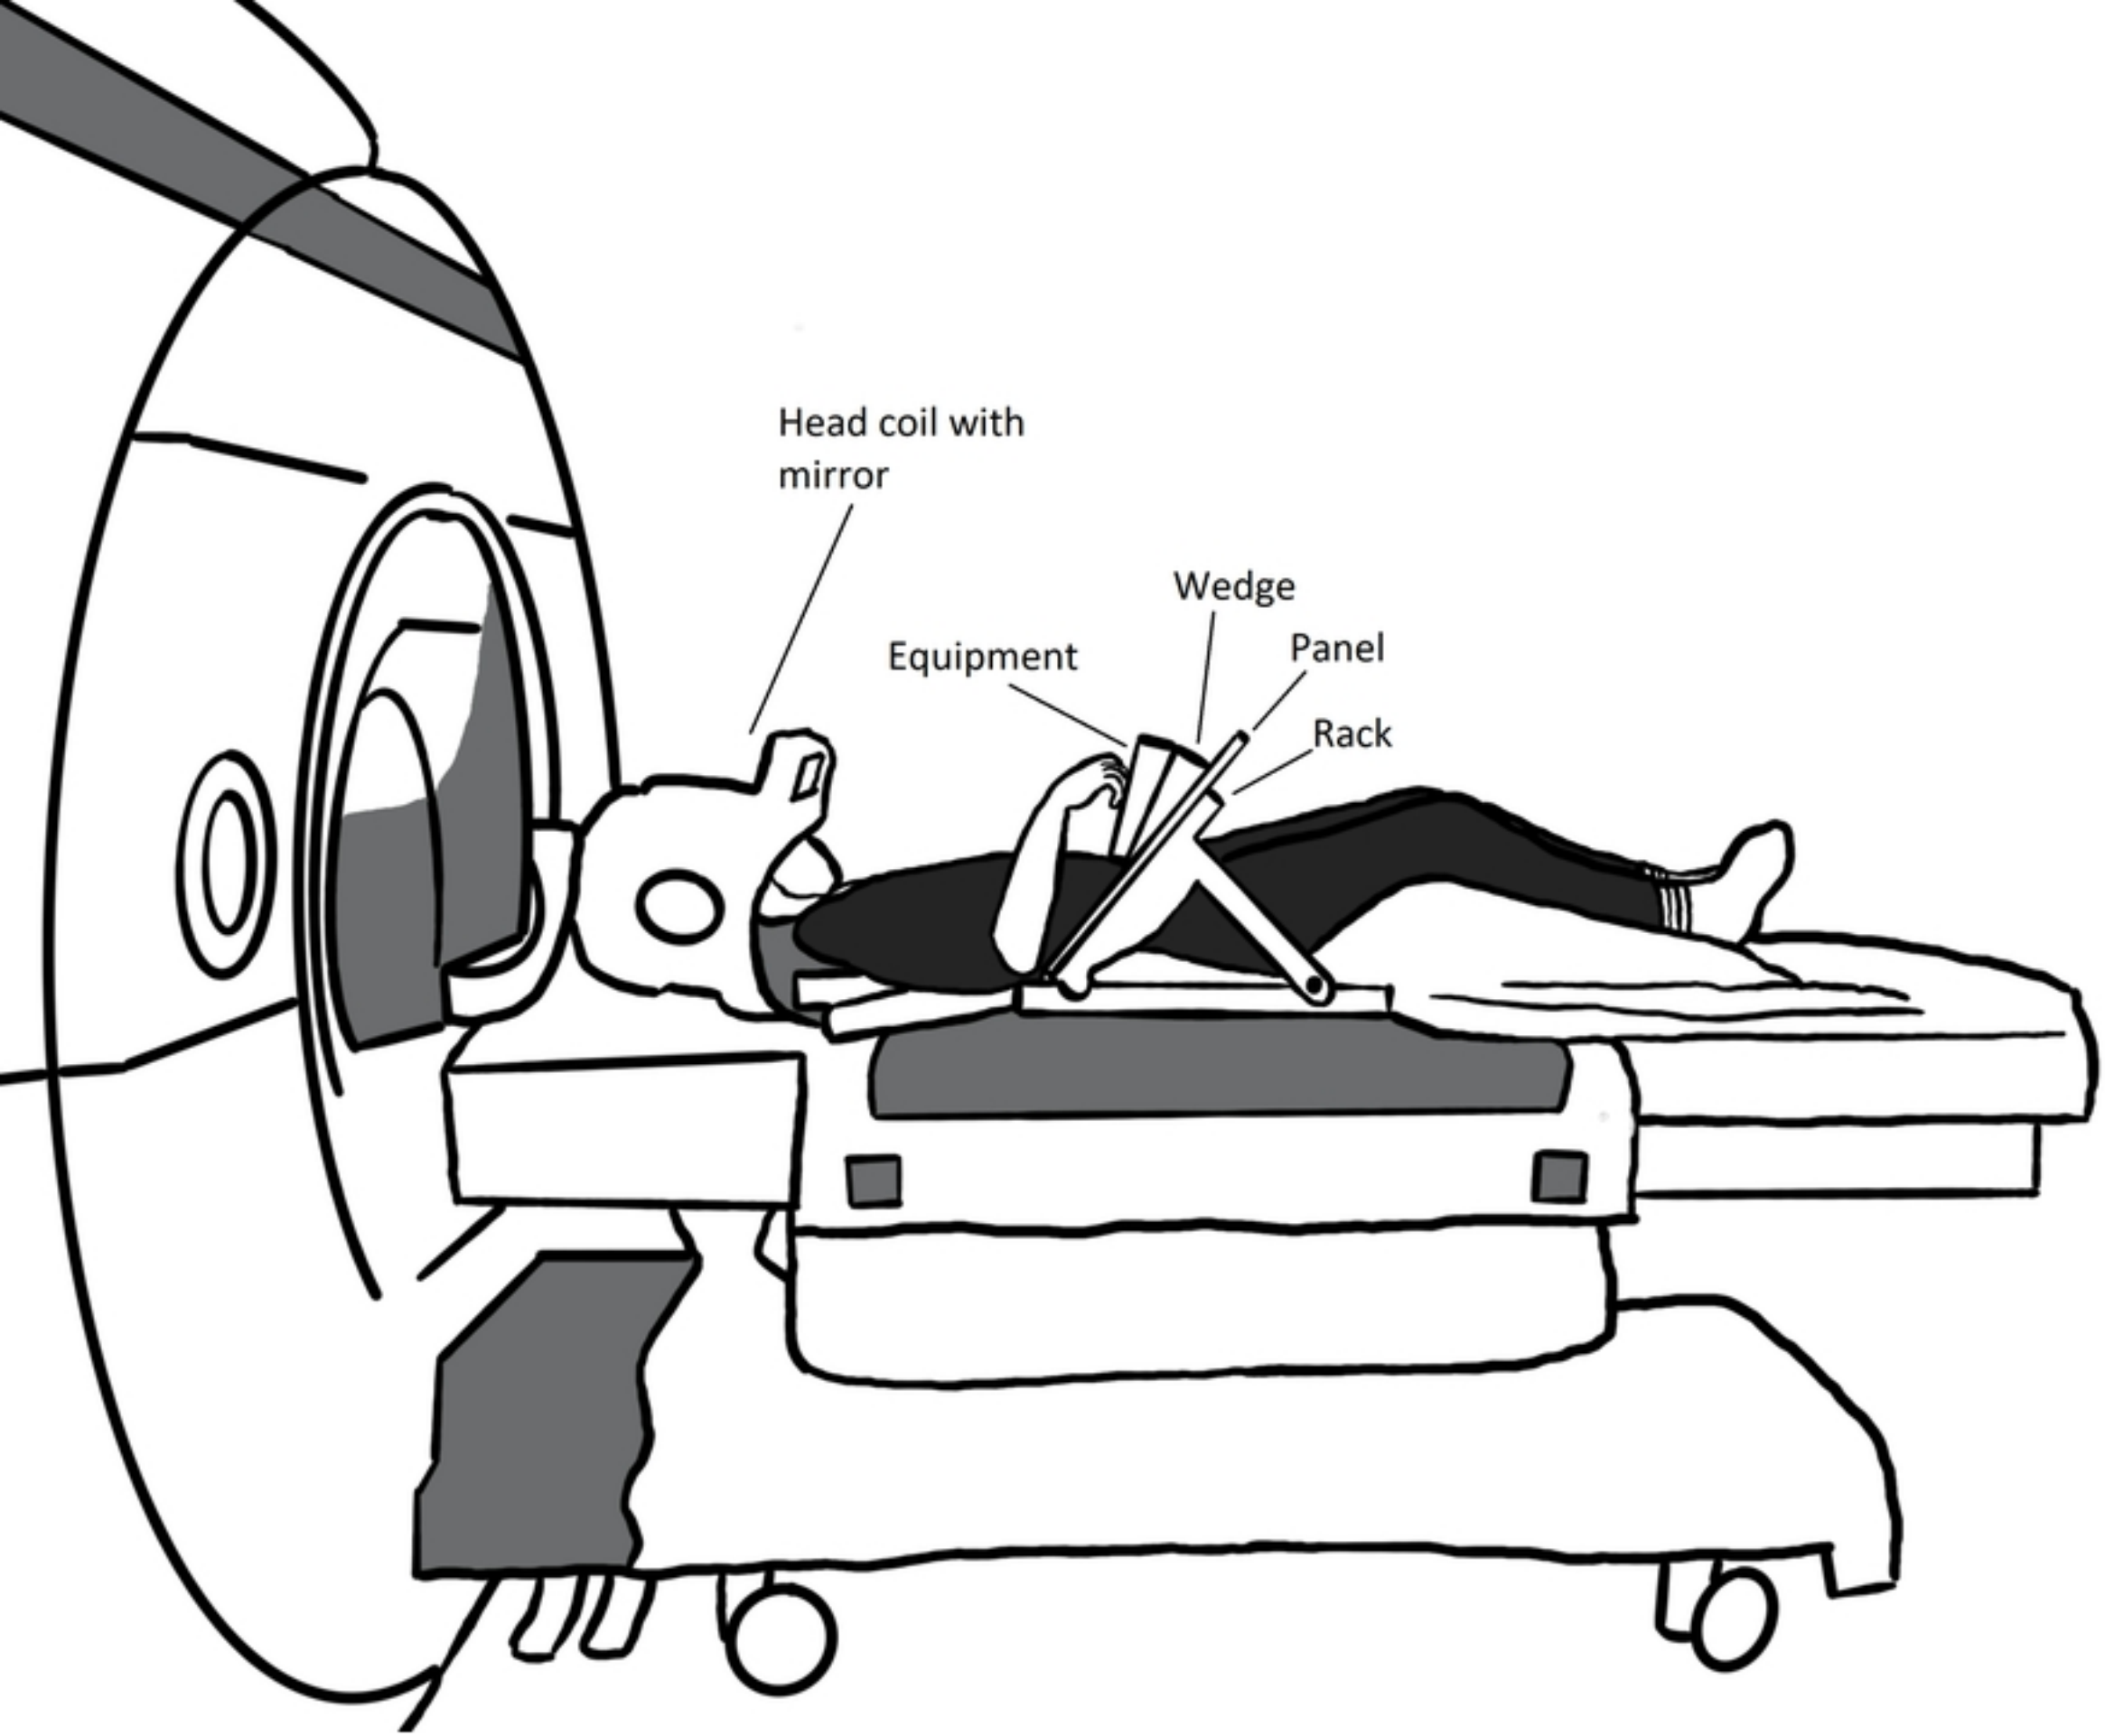

Figure
